# Supplementary material for: Formation of supermolecular chiral gels from l-aspartic acid-based perylenebisimides and benzene dicarboxylic acids
Source: Royal Society of Chemistry journal article supplement (doi:10.1039/c7nj01107e), 2017-01-01
Supplement: c7nj01107e1.pdf [file c7nj01107e1.pdf]

## Supporting information

### Formation of Supramolecular Chiral Gels from *L*-aspartic Acid-based Perylene Bisimides and Benzene Dicarboxylic Acids

Yizhi Liu, <sup>a</sup> Xinpei Gao, <sup>a</sup> Mingwei Zhao, <sup>b</sup> Fei Lu, <sup>a</sup> Liqiang Zheng <sup>\*a</sup>

*a* Key laboratory of Colloid and Interface Chemistry, Shandong University, Ministry of Education, Jinan, 250100, P. R. China

*b* School of Petroleum Engineering, State Key Laboratory of Heavy Oil Processing, China University of Petroleum (East China), Qingdao, Shandong 266580, PR China.

Table S1. Summary of the pK<sub>a</sub> values of different carboxylic acids, and the pH values and gel formation ability when mixed with APBI in water.

|                         | pK <sub>a1</sub>   | pK <sub>a2</sub>  | pH   | Gel formation |
|-------------------------|--------------------|-------------------|------|---------------|
| muriatic acid (HCl)     | -8.00 <sup>a</sup> | -                 | 5.24 | No            |
| Acetic Acid             | 4.76 <sup>a</sup>  | -                 | 5.61 | No            |
| Phthalic Acid (OPA)     | 2.98 <sup>a</sup>  | 5.28 <sup>a</sup> | 5.70 | Yes           |
| Isophthalic Acid (IPA)  | 3.46 <sup>a</sup>  | 4.46 <sup>a</sup> | 5.84 | Yes           |
| Terephthalic Acid (TPA) | 3.51 <sup>a</sup>  | 4.82 <sup>a</sup> | 5.90 | No            |
| Maleic acid (MA)        | 1.92 <sup>a</sup>  | 6.23 <sup>a</sup> | 5.95 | No            |

a. W. P. Jencks and J. Regenstein (1976) Ionization constants of acids and bases. In

*Handbook of Biochemistry and Molecular Biology*. (Fasman, G.D., ed.), pp. 305-351.

Table S2. Gelation test of APBI-4K<sup>+</sup> : IPA = 1 : 2 and APBI -4K<sup>+</sup> : OPA = 1 : 2.

| Benzenetricarboxylic acid | Critical concentration (wt %) | gelation (wt %) | Wt % of (g per 100 mL) | Critical gelation temperature ( C) |
|---------------------------|-------------------------------|-----------------|------------------------|------------------------------------|
| APBI/IPA                  | 0.55                          |                 | 0.55                   | 46                                 |
|                           |                               |                 | 1.11                   | 55                                 |
|                           |                               |                 | 2.22                   | 61                                 |
| APBI/OPA                  | 0.88                          |                 | 1.11                   | 45                                 |
|                           |                               |                 | 2.22                   | 47                                 |

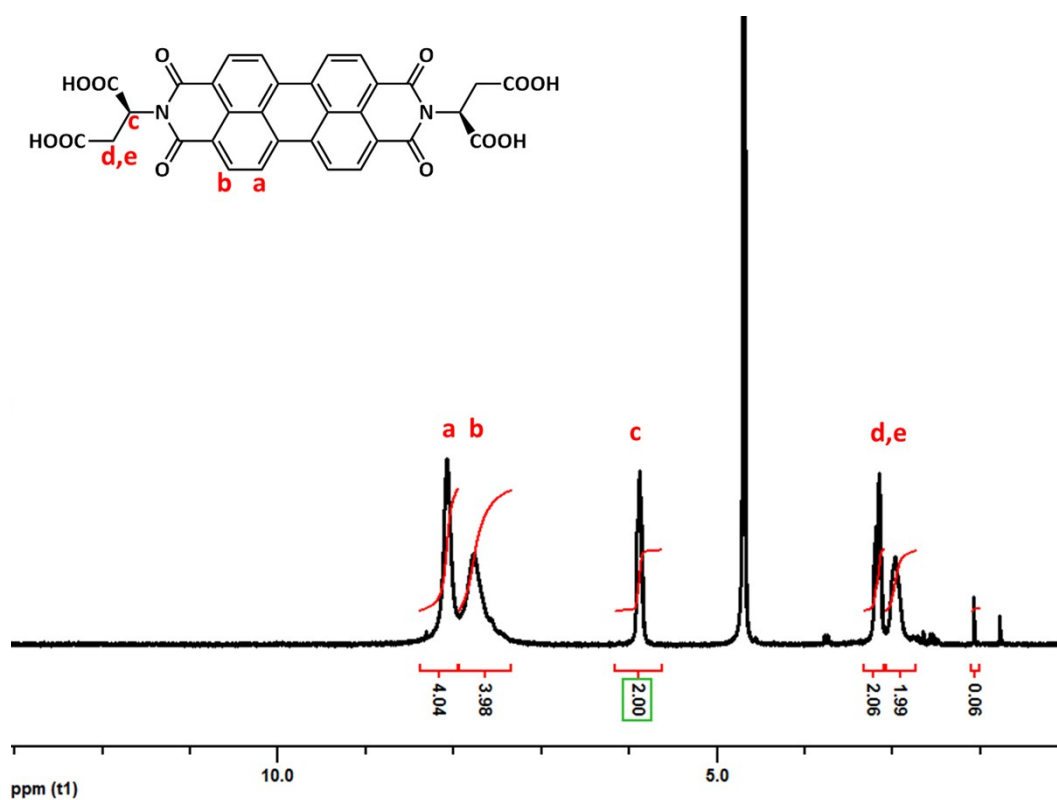

Figure S1. <sup>1</sup>H NMR data (D<sub>2</sub>O) for APBI.

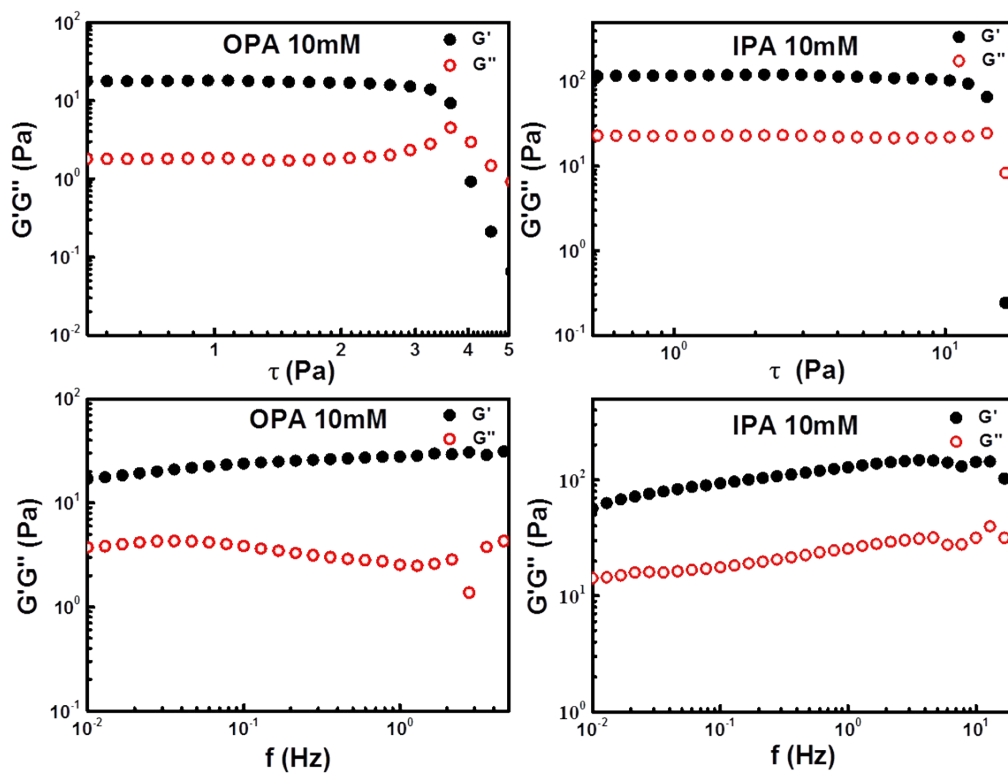

Figure S2. Oscillatory amplitude sweep and frequency sweep experiments of APBI-4K<sup>+</sup> : OPA = 1 : 2 hydrogel or APBI-4K<sup>+</sup> : IPA = 1 : 2 hydrogel.

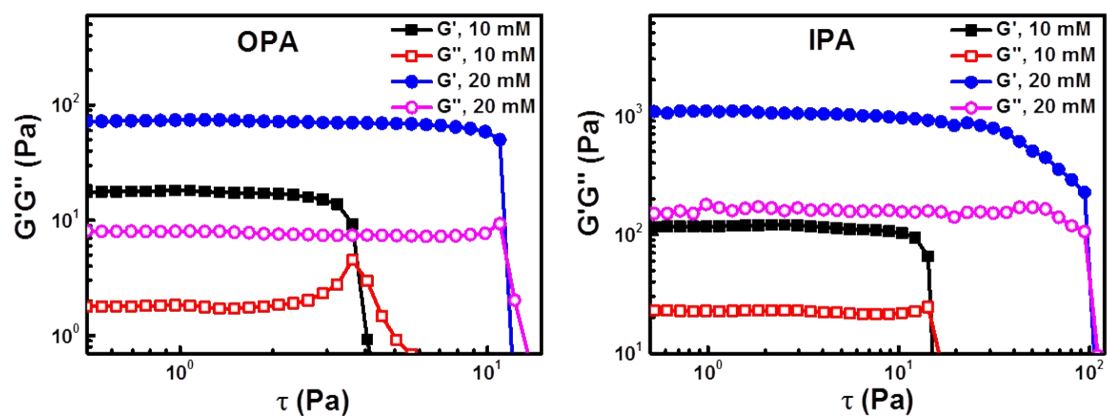

Figure S3. Oscillatory amplitude sweep experiments of APBI-4K<sup>+</sup> : OPA = 1 : 2 hydrogel or APBI-4K<sup>+</sup> : IPA = 1 : 2 at different concentrations.

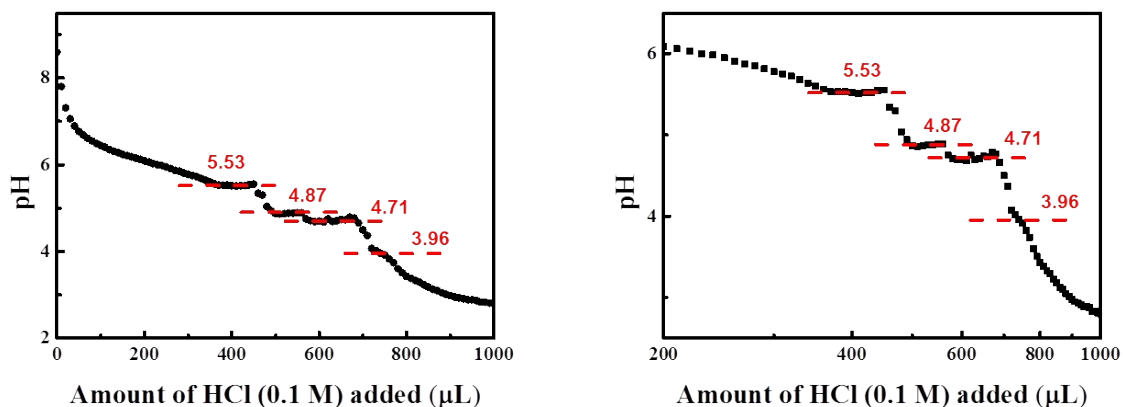

Fig. S4 Change in pH upon the addition of 0.1 M HCl in a solution of APBI-4K<sup>+</sup> (a) on a linear scale and (b) on a log time scale.

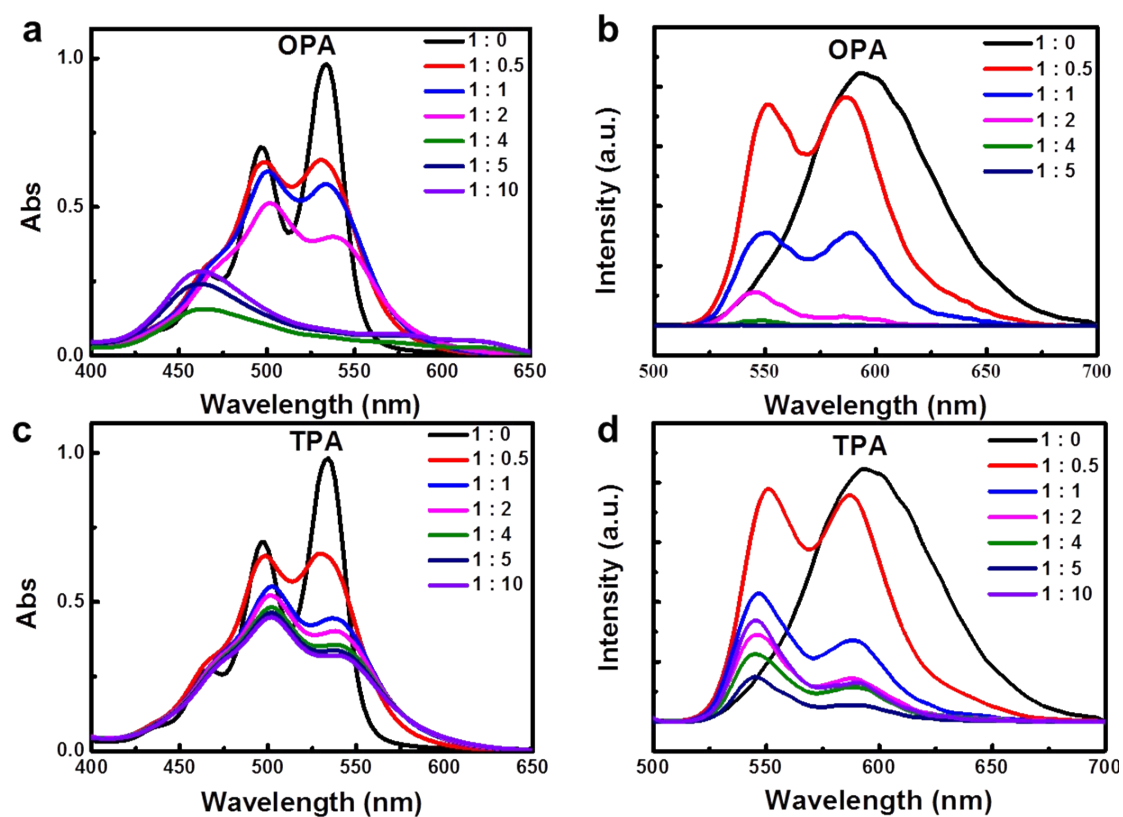

Figure S5. Absorption spectra of APBI-4K<sup>+</sup> in the presence of OPA a) or TPA c) with different molar ratios APBI-4K<sup>+</sup>/OPA, APBI-4K<sup>+</sup>/TPA. Fluorescence spectra of APBI-4K<sup>+</sup> in the presence of OPA b) or TPA d) with different molar ratios APBI-4K<sup>+</sup>/OPA, APBI/TPA.

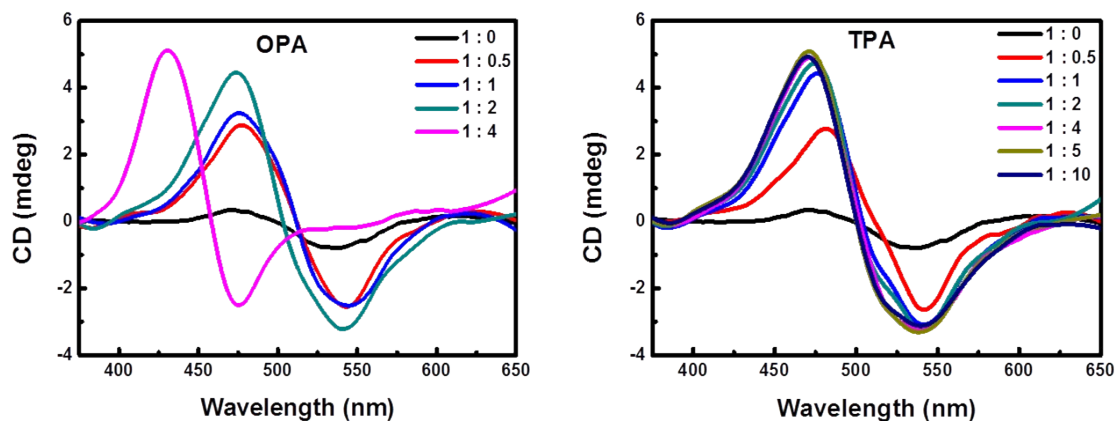

Figure S6. CD spectra of APBI-4K<sup>+</sup> in the presence of OPA a) or TPA b) with different molar ratios APBI-4K<sup>+</sup>/OPA, APBI-4K<sup>+</sup>/TPA.

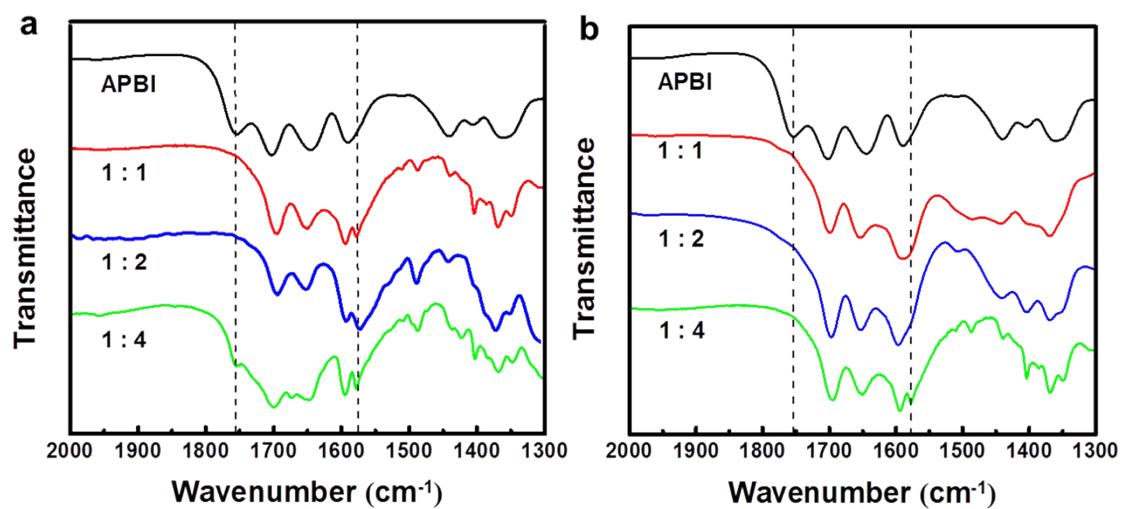

Figure S7. FT-IR spectra of APBI and a) APBI-4K<sup>+</sup>/OPA, b) APBI-4K<sup>+</sup>/TPA with different molar ratios.

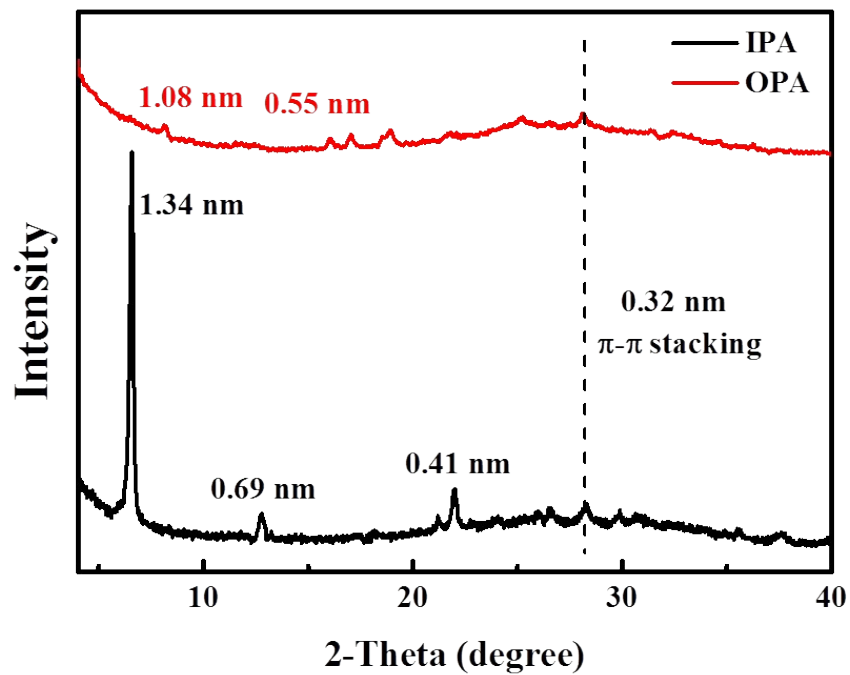

Fig. S8 The XRD pattern of the freeze-dried gels of APBI-4K<sup>+</sup>/IPA and APBI-4K<sup>+</sup>/OPA.

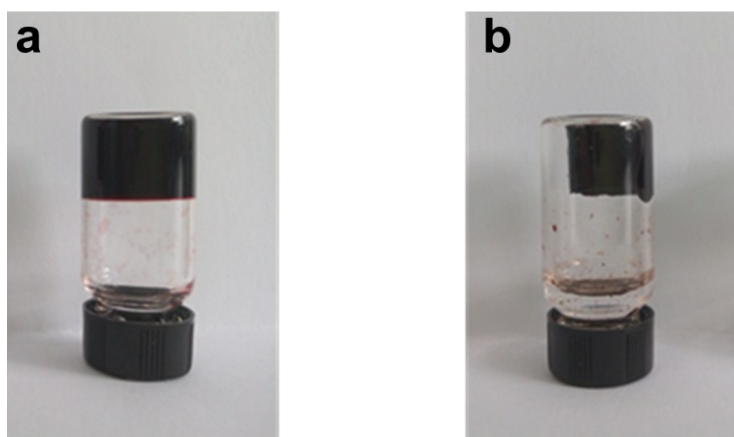

Fig. S9 The gels formed with APBI and different concentrations of GdL (a 5 mg/mL; b 10 mg/mL).
